# Supplementary material for: Does happiness matter to health system efficiency? A performance analysis
Source: PubMed Central journal article supplement (PMC6755568; doi:10.1186/s13561-018-0214-6), 2018-12-21
Supplement: 13561_2018_214_MOESM1_ESM.pdf [file 13561_2018_214_MOESM1_ESM.pdf]

Appendix A: Previous health system efficiency studies.

Table A1. Summary of selected OECD and global health system efficiency studies

| Author                            | Sample, Year                                | Method |     | Input Measure |                     |            |           |                                 |                         |                   |                    |               |        |                   |              |     |                         |        |                             |            |                         |                     |           |
|-----------------------------------|---------------------------------------------|--------|-----|---------------|---------------------|------------|-----------|---------------------------------|-------------------------|-------------------|--------------------|---------------|--------|-------------------|--------------|-----|-------------------------|--------|-----------------------------|------------|-------------------------|---------------------|-----------|
|                                   |                                             | DEA    | SFA | Age structure | Alcohol consumption | Discharges | Education | Fruits & vegetables consumption | Gross capital formation | Health employment | Health expenditure | Hospital beds | Income | Income inequality | Labour force | MRI | Non-physician personnel | Nurses | Pharmaceutical consumptions | Physicians | Physician consultations | Tobacco consumption | Pollution |
| <i>OECD Health System Studies</i> |                                             |        |     |               |                     |            |           |                                 |                         |                   |                    |               |        |                   |              |     |                         |        |                             |            |                         |                     |           |
| de Cos and Moral-Benito [16]      | 29 OECD countries, 1997-2009                |        | •   |               | •                   |            |           | •                               |                         |                   | •                  | •             |        |                   |              |     |                         |        |                             |            |                         | •                   | •         |
| Hadad et al. [17]                 | 31 OECD countries, 2007                     | •      |     |               |                     |            |           | •                               |                         | •                 | •                  | •             |        |                   |              |     |                         |        |                             | •          |                         |                     |           |
| Wranik [18]                       | 21 OECD countries, 1970-2008                |        | •   | •             |                     |            |           |                                 |                         | •                 |                    |               | •      | •                 |              |     |                         |        |                             |            |                         |                     |           |
| Afonso and Aubyn [19]             | 21 OECD countries, 2000-2003                | •      |     |               |                     |            |           |                                 |                         |                   | •                  |               |        |                   | •            |     | •                       |        | •                           |            |                         |                     |           |
| Spinks and Hollingsworth [20]     | 28 OECD countries, 1993-1997, 1995-2000     | •      |     |               |                     |            | •         |                                 |                         | •                 |                    | •             |        |                   |              |     |                         |        |                             |            |                         |                     |           |
| Afonso and Aubyn [21]             | 24 OECD countries, 2000                     | •      |     |               |                     |            |           |                                 |                         |                   | •                  |               |        |                   |              |     | •                       |        | •                           |            |                         |                     |           |
| Bhat [22]                         | 24 OECD countries, 1996                     | •      |     |               |                     |            |           |                                 |                         |                   | •                  |               |        |                   |              |     | •                       | •      | •                           |            |                         |                     |           |
| Osterkamp [23]                    | 29 OECD countries, 1980, 1990, 2000         | •      |     | •             |                     |            |           |                                 | •                       | •                 |                    | •             |        |                   |              |     |                         |        |                             |            |                         |                     |           |
| Retzlaff-Roberts et al. [24]      | 27 OECD countries, 1998                     | •      |     |               |                     |            | •         |                                 |                         | •                 | •                  |               | •      |                   | •            |     |                         |        | •                           |            |                         | •                   |           |
| Puig-Junoy [25]                   | All OECD countries except Turkey, 1961-1990 | •      |     | •             | •                   |            |           |                                 |                         |                   | •                  |               |        |                   |              |     | •                       |        | •                           |            |                         | •                   |           |





Table A1 (cont...). Summary of selected OECD and global health system efficiency studies.

| Author                                       | Sample, Year                   | Method |     | Output Measure |                                      |                                     |            |                       |        |                  |                 |                         |                              |
|----------------------------------------------|--------------------------------|--------|-----|----------------|--------------------------------------|-------------------------------------|------------|-----------------------|--------|------------------|-----------------|-------------------------|------------------------------|
|                                              |                                | DEA    | SFA | Age structure  | Composite measure of health delivery | Disability-adjusted life expectancy | Discharges | Immunisation coverage | Income | Infant mortality | Life expectancy | Physician consultations | Potential years of life lost |
| <i>Regional/Global Health System Studies</i> |                                |        |     |                |                                      |                                     |            |                       |        |                  |                 |                         |                              |
| Sinimole [26]                                | 180 WHO members, 2008          | •      |     |                |                                      |                                     |            | •                     |        | •                |                 |                         |                              |
| Mirmirani and Lippmann [35]                  | 13 countries of G12, 1991-1995 | •      |     |                |                                      |                                     |            |                       |        | •                | •               |                         |                              |
| Oglobin [27]                                 | 78 countries, 2000, 2003, 2007 |        | •   |                |                                      | •                                   |            |                       |        |                  |                 |                         |                              |
| Greene [28]                                  | 191 countries, 1997            |        | •   |                | •                                    |                                     |            |                       |        |                  |                 |                         |                              |
| Kumbhakar [30]                               | 140 WHO members, 1993-1997     |        | •   |                |                                      | •                                   |            |                       |        |                  |                 |                         |                              |
| Tajnikar and Dosenovic Bonca [36]            | 16 EU countries, 2000          | •      |     |                |                                      |                                     | •          |                       |        | •                | •               | •                       |                              |
| Grosskopf et al. [31]                        | 143 countries, 1997            | •      |     |                |                                      |                                     |            |                       | •      | •                | •               |                         |                              |
| Greene [29]                                  | 191 countries, 1993-1997       |        | •   |                | •                                    | •                                   |            |                       |        |                  |                 |                         |                              |
| Hollingsworth and Wildman [32]               | 191 countries, 1993-1997       | •      | •   |                |                                      | •                                   |            |                       |        |                  |                 |                         |                              |

Notes: DEA: Data Envelopment Analysis; SFA: Stochastic Frontier Analysis
