# Supplementary material for: Does happiness matter to health system efficiency? A performance analysis
Source: PubMed Central journal article supplement (PMC6755568; doi:10.1186/s13561-018-0214-6), 2018-12-21
Supplement: 13561_2018_214_MOESM2_ESM.pdf [file 13561_2018_214_MOESM2_ESM.pdf]

Appendix B: The results of global health system performance, 2014.

Table A2. Global health system performance: Original DEA scores, bias and bias-corrected efficiency scores

| Country              | Income Group | Original Score | Bias    | Bias-corrected Score | Confidence Interval |        |
|----------------------|--------------|----------------|---------|----------------------|---------------------|--------|
|                      |              |                |         |                      | Lower               | Upper  |
| Italy                | High         | 1.0018         | -0.0073 | 1.0091               | 1.0023              | 1.0235 |
| Israel               | High         | 1.0000         | -0.0122 | 1.0122               | 1.0004              | 1.0278 |
| Greece               | High         | 1.0000         | -0.0127 | 1.0127               | 1.0004              | 1.0274 |
| Spain                | High         | 1.0000         | -0.0130 | 1.0130               | 1.0004              | 1.0367 |
| Switzerland          | High         | 1.0121         | -0.0030 | 1.0151               | 1.0124              | 1.0219 |
| Qatar                | High         | 1.0040         | -0.0152 | 1.0192               | 1.0045              | 1.0613 |
| Japan                | High         | 1.0000         | -0.0196 | 1.0196               | 1.0005              | 1.0500 |
| United Arab Emirates | High         | 1.0052         | -0.0146 | 1.0198               | 1.0056              | 1.0491 |
| Portugal             | High         | 1.0000         | -0.0200 | 1.0200               | 1.0004              | 1.0499 |
| France               | High         | 1.0168         | -0.0047 | 1.0215               | 1.0173              | 1.0292 |
| Malta                | High         | 1.0000         | -0.0241 | 1.0241               | 1.0004              | 1.0595 |
| Slovenia             | High         | 1.0000         | -0.0245 | 1.0245               | 1.0004              | 1.0814 |
| Luxembourg           | High         | 1.0107         | -0.0150 | 1.0256               | 1.0111              | 1.0810 |
| Croatia              | High         | 1.0199         | -0.0066 | 1.0264               | 1.0203              | 1.0353 |
| Estonia              | High         | 1.0000         | -0.0280 | 1.0280               | 1.0003              | 1.0954 |
| Canada               | High         | 1.0230         | -0.0054 | 1.0283               | 1.0233              | 1.0445 |
| Bahrain              | High         | 1.0138         | -0.0156 | 1.0294               | 1.0141              | 1.0619 |
| Netherlands          | High         | 1.0247         | -0.0049 | 1.0297               | 1.0251              | 1.0379 |
| Austria              | High         | 1.0229         | -0.0078 | 1.0307               | 1.0233              | 1.0426 |
| Chile                | High         | 1.0000         | -0.0312 | 1.0312               | 1.0003              | 1.1096 |
| Latvia               | High         | 1.0209         | -0.0117 | 1.0326               | 1.0213              | 1.0652 |
| Singapore            | High         | 1.0000         | -0.0342 | 1.0342               | 1.0004              | 1.1396 |
| United Kingdom       | High         | 1.0283         | -0.0063 | 1.0346               | 1.0288              | 1.0469 |
| Poland               | High         | 1.0299         | -0.0048 | 1.0347               | 1.0302              | 1.0420 |
| Australia            | High         | 1.0301         | -0.0048 | 1.0349               | 1.0304              | 1.0430 |
| Cyprus               | High         | 1.0000         | -0.0351 | 1.0351               | 1.0004              | 1.1426 |
| Iceland              | High         | 1.0000         | -0.0354 | 1.0354               | 1.0004              | 1.1377 |
| Norway               | High         | 1.0270         | -0.0087 | 1.0357               | 1.0273              | 1.0576 |
| Finland              | High         | 1.0198         | -0.0160 | 1.0358               | 1.0202              | 1.0863 |

Table A2 (cont...). Global health system performance: Original DEA scores, bias and bias-corrected efficiency scores.

| Country              | Income Group | Original Score | Bias    | Bias-corrected Score | Confidence Interval |        |
|----------------------|--------------|----------------|---------|----------------------|---------------------|--------|
|                      |              |                |         |                      | Lower               | Upper  |
| Sweden               | High         | 1.0272         | -0.0105 | 1.0377               | 1.0276              | 1.0684 |
| Uruguay              | High         | 1.0296         | -0.0090 | 1.0387               | 1.0300              | 1.0534 |
| Ireland              | High         | 1.0307         | -0.0086 | 1.0393               | 1.0311              | 1.0608 |
| Kuwait               | High         | 1.0314         | -0.0101 | 1.0414               | 1.0317              | 1.0598 |
| Denmark              | High         | 1.0384         | -0.0052 | 1.0436               | 1.0388              | 1.0580 |
| New Zealand          | High         | 1.0319         | -0.0119 | 1.0438               | 1.0323              | 1.0743 |
| Belgium              | High         | 1.0371         | -0.0069 | 1.0440               | 1.0375              | 1.0552 |
| Germany              | High         | 1.0439         | -0.0053 | 1.0492               | 1.0443              | 1.0559 |
| Slovak Republic      | High         | 1.0550         | -0.0060 | 1.0610               | 1.0554              | 1.0695 |
| Hungary              | High         | 1.0575         | -0.0045 | 1.0620               | 1.0581              | 1.0689 |
| Lithuania            | High         | 1.0724         | -0.0071 | 1.0795               | 1.0729              | 1.0920 |
| Trinidad and Tobago  | High         | 1.0999         | -0.0145 | 1.1145               | 1.1003              | 1.1404 |
| Saudi Arabia         | High         | 1.1102         | -0.0089 | 1.1192               | 1.1106              | 1.1324 |
| Thailand             | Upper-Middle | 1.0054         | -0.0088 | 1.0142               | 1.0058              | 1.0260 |
| China                | Upper-Middle | 1.0000         | -0.0149 | 1.0149               | 1.0003              | 1.0289 |
| Bosnia & Herzegovina | Upper-Middle | 1.0000         | -0.0159 | 1.0159               | 1.0004              | 1.0363 |
| Albania              | Upper-Middle | 1.0000         | -0.0196 | 1.0196               | 1.0004              | 1.0568 |
| Jamaica              | Upper-Middle | 1.0000         | -0.0306 | 1.0306               | 1.0004              | 1.0927 |
| Mexico               | Upper-Middle | 1.0244         | -0.0077 | 1.0321               | 1.0247              | 1.0458 |
| Costa Rica           | Upper-Middle | 1.0000         | -0.0325 | 1.0325               | 1.0004              | 1.1131 |
| Macedonia, FYR       | Upper-Middle | 1.0222         | -0.0109 | 1.0331               | 1.0226              | 1.0527 |
| Belarus              | Upper-Middle | 1.0000         | -0.0334 | 1.0334               | 1.0005              | 1.1375 |
| Peru                 | Upper-Middle | 1.0243         | -0.0092 | 1.0335               | 1.0247              | 1.0474 |
| Belize               | Upper-Middle | 1.0000         | -0.0339 | 1.0339               | 1.0004              | 1.1376 |
| Montenegro           | Upper-Middle | 1.0000         | -0.0341 | 1.0341               | 1.0004              | 1.1348 |
| Ecuador              | Upper-Middle | 1.0264         | -0.0084 | 1.0348               | 1.0268              | 1.0488 |
| Iran                 | Upper-Middle | 1.0000         | -0.0349 | 1.0349               | 1.0006              | 1.1369 |
| Dominican Republic   | Upper-Middle | 1.0268         | -0.0105 | 1.0373               | 1.0272              | 1.0533 |

Table A2 (cont...). Global health system performance: Original DEA scores, bias and bias-corrected efficiency scores.

| Country         | Income Group | Original Score | Bias    | Bias-corrected Score | Confidence Interval |        |
|-----------------|--------------|----------------|---------|----------------------|---------------------|--------|
|                 |              |                |         |                      | Lower               | Upper  |
| Turkey          | Upper-Middle | 1.0351         | -0.0044 | 1.0395               | 1.0355              | 1.0464 |
| Georgia         | Upper-Middle | 1.0314         | -0.0111 | 1.0424               | 1.0319              | 1.0629 |
| Serbia          | Upper-Middle | 1.0372         | -0.0052 | 1.0424               | 1.0376              | 1.0491 |
| Malaysia        | Upper-Middle | 1.0332         | -0.0097 | 1.0429               | 1.0336              | 1.0585 |
| Panama          | Upper-Middle | 1.0347         | -0.0108 | 1.0454               | 1.0351              | 1.0665 |
| Paraguay        | Upper-Middle | 1.0349         | -0.0133 | 1.0483               | 1.0353              | 1.0759 |
| Romania         | Upper-Middle | 1.0445         | -0.0047 | 1.0492               | 1.0448              | 1.0557 |
| Lebanon         | Upper-Middle | 1.0434         | -0.0086 | 1.0519               | 1.0437              | 1.0646 |
| Colombia        | Upper-Middle | 1.0444         | -0.0083 | 1.0528               | 1.0447              | 1.0678 |
| Brazil          | Upper-Middle | 1.0507         | -0.0061 | 1.0568               | 1.0510              | 1.0643 |
| Jordan          | Upper-Middle | 1.0519         | -0.0082 | 1.0601               | 1.0523              | 1.0735 |
| Bulgaria        | Upper-Middle | 1.0605         | -0.0046 | 1.0651               | 1.0608              | 1.0708 |
| Libya           | Upper-Middle | 1.0592         | -0.0085 | 1.0677               | 1.0596              | 1.0804 |
| Azerbaijan      | Upper-Middle | 1.0773         | -0.0050 | 1.0824               | 1.0777              | 1.0897 |
| Kazakhstan      | Upper-Middle | 1.1018         | -0.0037 | 1.1056               | 1.1022              | 1.1119 |
| Turkmenistan    | Upper-Middle | 1.0996         | -0.0108 | 1.1104               | 1.1000              | 1.1322 |
| Iraq            | Upper-Middle | 1.1123         | -0.0110 | 1.1233               | 1.1129              | 1.1417 |
| Namibia         | Upper-Middle | 1.1310         | -0.0152 | 1.1462               | 1.1315              | 1.1855 |
| Botswana        | Upper-Middle | 1.1591         | -0.0183 | 1.1775               | 1.1596              | 1.2126 |
| Vietnam         | Lower-Middle | 1.0000         | -0.0130 | 1.0130               | 1.0004              | 1.0300 |
| Guatemala       | Lower-Middle | 1.0023         | -0.0118 | 1.0141               | 1.0028              | 1.0344 |
| Nicaragua       | Lower-Middle | 1.0000         | -0.0158 | 1.0158               | 1.0004              | 1.0381 |
| Tunisia         | Lower-Middle | 1.0081         | -0.0080 | 1.0161               | 1.0084              | 1.0297 |
| Kyrgyz Republic | Lower-Middle | 1.0000         | -0.0178 | 1.0178               | 1.0006              | 1.0410 |
| Armenia         | Lower-Middle | 1.0000         | -0.0221 | 1.0221               | 1.0004              | 1.0582 |
| El Salvador     | Lower-Middle | 1.0000         | -0.0223 | 1.0223               | 1.0003              | 1.0635 |
| Morocco         | Lower-Middle | 1.0000         | -0.0225 | 1.0225               | 1.0003              | 1.0525 |
| Tajikistan      | Lower-Middle | 1.0143         | -0.0126 | 1.0269               | 1.0147              | 1.0469 |

Table A2 (cont...). Global health system performance: Original DEA scores, bias and bias-corrected efficiency scores.

| Country                  | Income Group | Original Score | Bias    | Bias-corrected Score | Confidence Interval |        |
|--------------------------|--------------|----------------|---------|----------------------|---------------------|--------|
|                          |              |                |         |                      | Lower               | Upper  |
| Sri Lanka                | Lower-Middle | 1.0000         | -0.0314 | 1.0314               | 1.0004              | 1.1119 |
| Bangladesh               | Lower-Middle | 1.0000         | -0.0321 | 1.0321               | 1.0005              | 1.1062 |
| Bhutan                   | Lower-Middle | 1.0000         | -0.0335 | 1.0335               | 1.0004              | 1.1395 |
| Bolivia                  | Lower-Middle | 1.0309         | -0.0116 | 1.0425               | 1.0315              | 1.0654 |
| Yemen, Rep.              | Lower-Middle | 1.0294         | -0.0139 | 1.0433               | 1.0299              | 1.0748 |
| Indonesia                | Lower-Middle | 1.0345         | -0.0119 | 1.0463               | 1.0350              | 1.0703 |
| Cambodia                 | Lower-Middle | 1.0379         | -0.0134 | 1.0513               | 1.0383              | 1.0810 |
| Moldova                  | Lower-Middle | 1.0487         | -0.0081 | 1.0568               | 1.0492              | 1.0740 |
| Egypt, Arab Rep.         | Lower-Middle | 1.0431         | -0.0152 | 1.0582               | 1.0435              | 1.0955 |
| Ukraine                  | Lower-Middle | 1.0605         | -0.0085 | 1.0690               | 1.0609              | 1.0864 |
| Uzbekistan               | Lower-Middle | 1.0663         | -0.0072 | 1.0736               | 1.0667              | 1.0916 |
| India                    | Lower-Middle | 1.0675         | -0.0092 | 1.0766               | 1.0679              | 1.1000 |
| Ghana                    | Lower-Middle | 1.0786         | -0.0068 | 1.0854               | 1.0790              | 1.1025 |
| Pakistan                 | Lower-Middle | 1.0802         | -0.0164 | 1.0965               | 1.0807              | 1.1451 |
| Sudan                    | Lower-Middle | 1.0893         | -0.0109 | 1.1003               | 1.0897              | 1.1252 |
| Kenya                    | Lower-Middle | 1.0963         | -0.0076 | 1.1039               | 1.0969              | 1.1147 |
| Mongolia                 | Lower-Middle | 1.0997         | -0.0127 | 1.1124               | 1.1000              | 1.1378 |
| Zambia                   | Lower-Middle | 1.1345         | -0.0093 | 1.1438               | 1.1350              | 1.1600 |
| Syrian Arab Republic     | Lower-Middle | 1.1332         | -0.0132 | 1.1464               | 1.1336              | 1.1676 |
| Cameroon                 | Lower-Middle | 1.1721         | -0.0110 | 1.1830               | 1.1726              | 1.2059 |
| Rwanda                   | Low          | 1.0011         | -0.0159 | 1.0169               | 1.0015              | 1.0666 |
| Malawi                   | Low          | 1.0034         | -0.0159 | 1.0193               | 1.0038              | 1.0547 |
| Ethiopia                 | Low          | 1.0000         | -0.0331 | 1.0331               | 1.0003              | 1.1338 |
| Senegal                  | Low          | 1.0000         | -0.0332 | 1.0332               | 1.0004              | 1.1390 |
| Burkina Faso             | Low          | 1.0000         | -0.0337 | 1.0337               | 1.0005              | 1.1393 |
| Central African Republic | Low          | 1.0000         | -0.0339 | 1.0339               | 1.0003              | 1.1379 |
| Mali                     | Low          | 1.0000         | -0.0342 | 1.0342               | 1.0005              | 1.1371 |
| Madagascar               | Low          | 1.0000         | -0.0342 | 1.0342               | 1.0004              | 1.1355 |

Table A2 (cont...). Global health system performance: Original DEA scores, bias and bias-corrected efficiency scores.

| Country     | Income Group | Original Score | Bias    | Bias-corrected Score | Confidence Interval |        |
|-------------|--------------|----------------|---------|----------------------|---------------------|--------|
|             |              |                |         |                      | Lower               | Upper  |
| Togo        | Low          | 1.0000         | -0.0342 | 1.0342               | 1.0003              | 1.1432 |
| Liberia     | Low          | 1.0000         | -0.0344 | 1.0344               | 1.0003              | 1.1416 |
| Benin       | Low          | 1.0791         | -0.0181 | 1.0972               | 1.0796              | 1.1468 |
| Tanzania    | Low          | 1.0933         | -0.0121 | 1.1053               | 1.0936              | 1.1372 |
| Uganda      | Low          | 1.0966         | -0.0098 | 1.1064               | 1.0971              | 1.1326 |
| Zimbabwe    | Low          | 1.1246         | -0.0130 | 1.1376               | 1.1250              | 1.1724 |
| Mozambique  | Low          | 1.1279         | -0.0171 | 1.1450               | 1.1283              | 1.1779 |
| Afghanistan | Low          | 1.1464         | -0.0167 | 1.1631               | 1.1470              | 1.2081 |

Note: Income groupings of countries are based on the World Bank Income Classifications (2014-2015)
